# Supplementary material for: Modified Huang-Lian-Jie-Du Decoction Ameliorates Aβ Synaptotoxicity in a Murine Model of Alzheimer's Disease
Source: Oxid Med Cell Longev. 2019 Nov 3;2019:8340192. doi: 10.1155/2019/8340192 (PMC6875425; doi:10.1155/2019/8340192)
Supplement: Supplementary Materials — mainly contain the additional behavioral tests, the additional metabolic profiles, and metabolic and microbial differences between modified-HLJDD and HLJDD. [file 8340192.f1.pdf]

## Supplementary Data

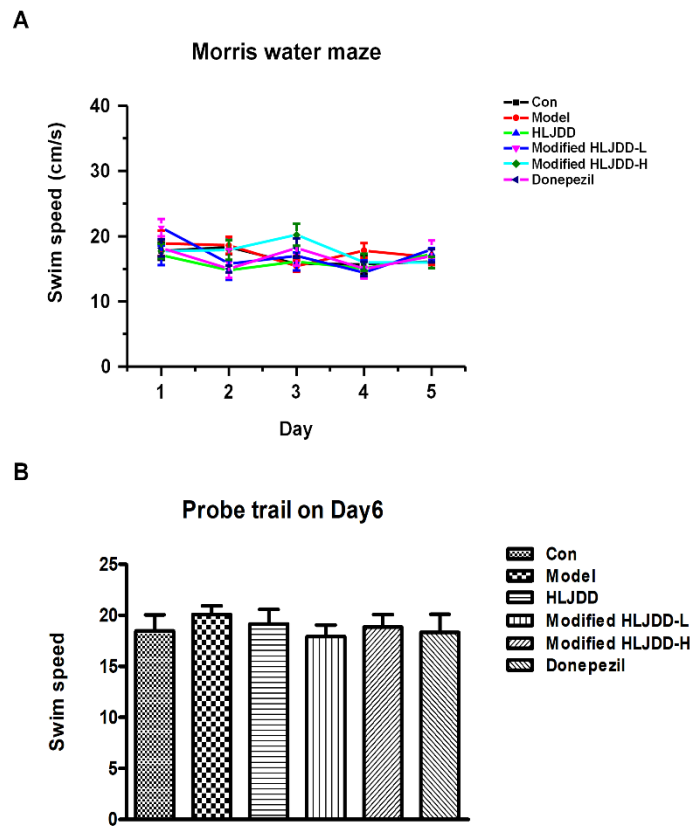

### Supplementary Fig. 1 Swim speed in the MWM

(A) Swim speed during a five-day training course in the MWM. (B) Swim speed in the probe trial in the MWM.  $n = 12$  per group. Results are expressed as the mean  $\pm$  SEM. Statistical significance was determined by one-way ANOVA and Bonferroni tests as *post-hoc* comparisons.

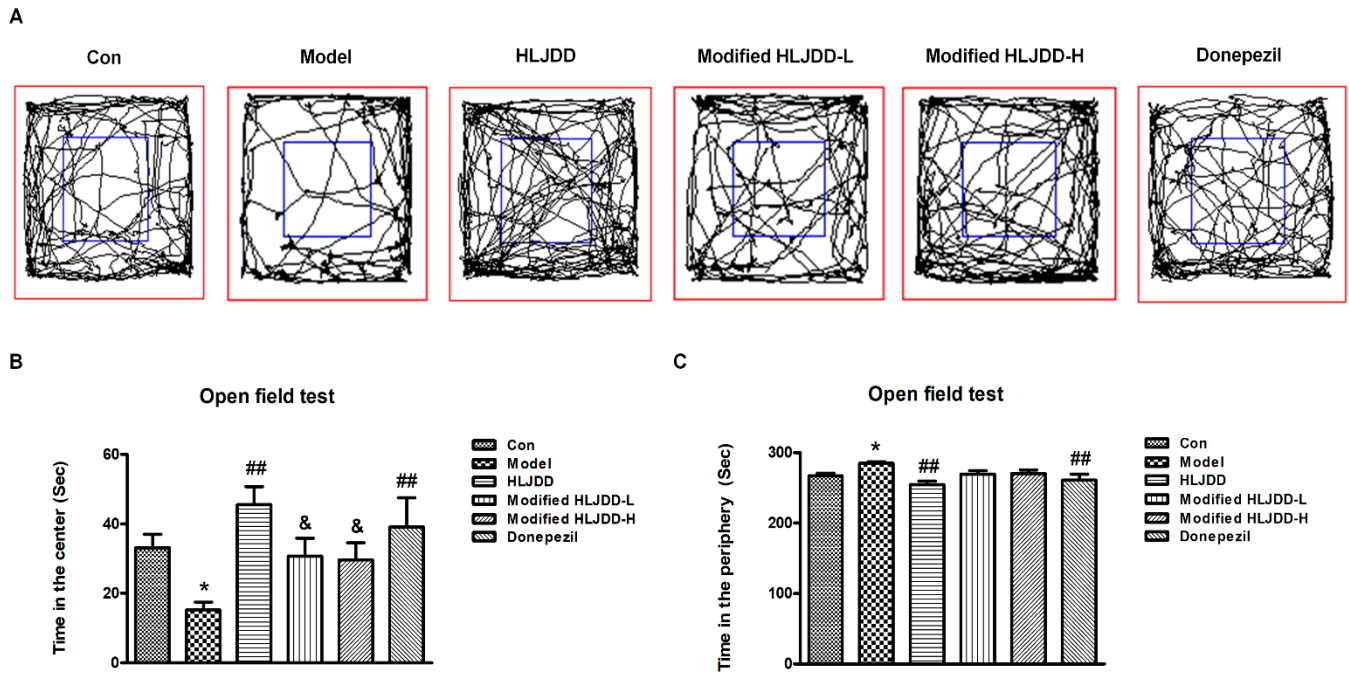

### Supplementary Fig. 2 The performance of mice upon modified-HLJDD treatment in the open field test

(A) Representative path tracings in the open field test. (B) Time spent in the center of the open-field after HLJDD, modified-HLJDD-L, modified-HLJDD-H, or Donepezil treatment in the AD model. (C) Time spent in the periphery of the open-field after HLJDD, modified-HLJDD-L, modified-HLJDD-H, or Donepezil treatment in the AD model.  $n = 12$  per group. Results are expressed as the mean  $\pm$  SEM. \* $p < 0.05$  vs. control group; ## $p < 0.01$  vs. model group; and & $p < 0.05$  vs. HLJDD group. Statistical significance was determined by one-way ANOVA and Bonferroni tests as *post-hoc* comparisons.

**A**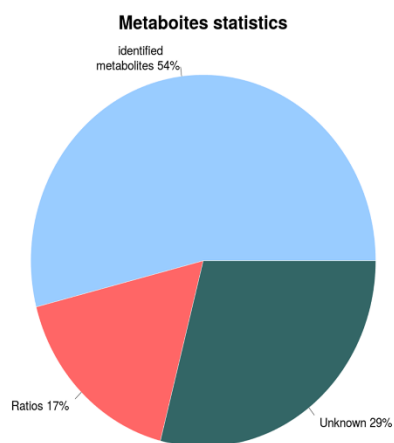**B**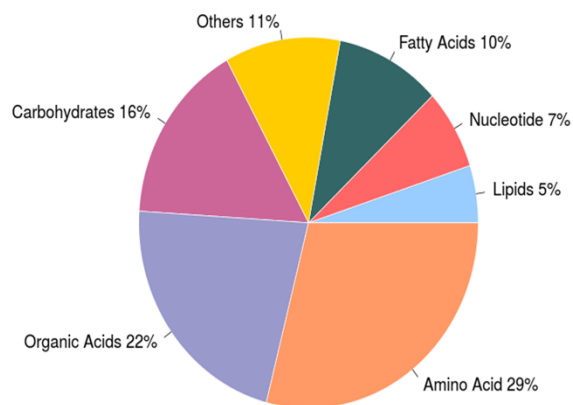

**Supplementary Fig. 3 Metabolite classes and compositions detected in the samples**

The annotated metabolites and their chemical classes are illustrated in A and B.

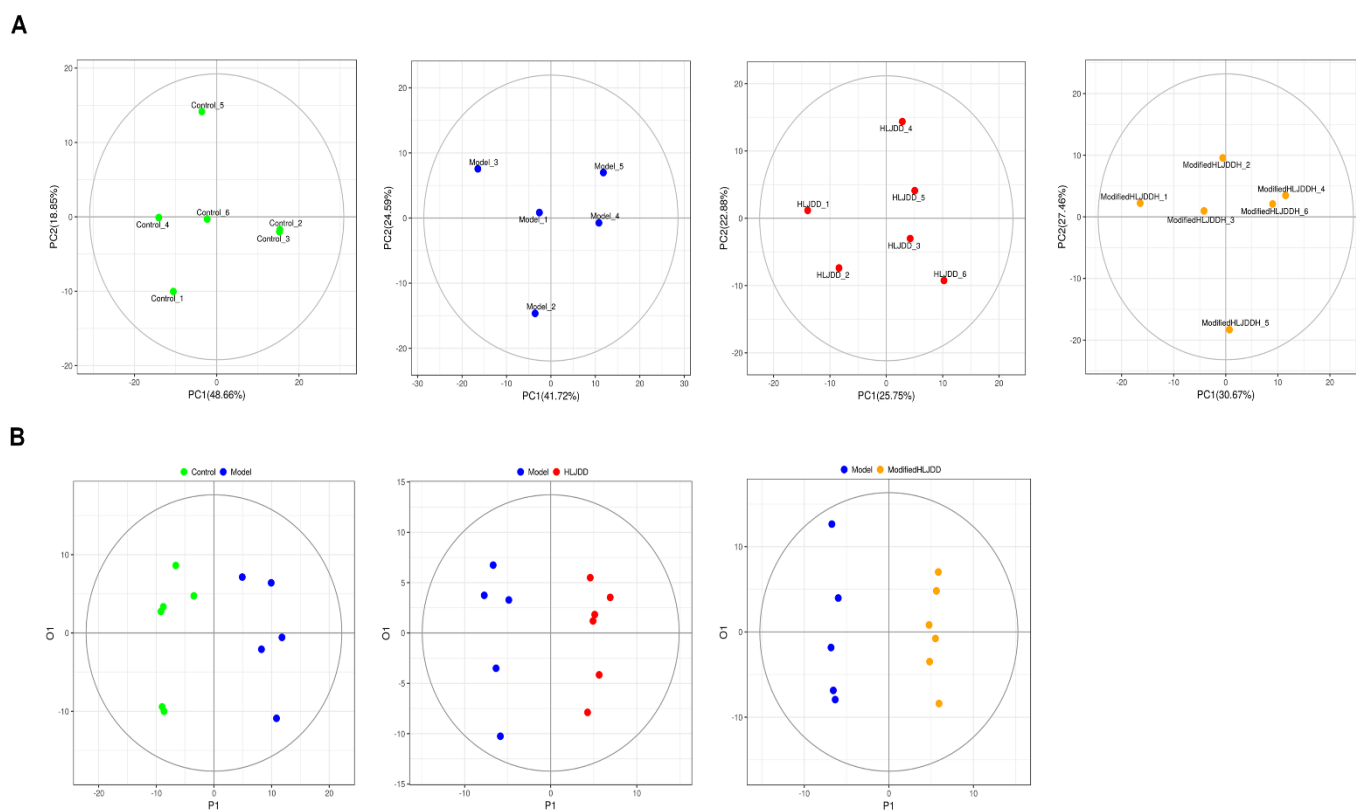

**Supplementary Fig. 4 The global metabolic profiles for the subjects from each subgroup**

(A) Overview of metabolic profiles of each subgroup using a PCA scores plot. (B) Visualization of overall metabolite profile differences among different groups.

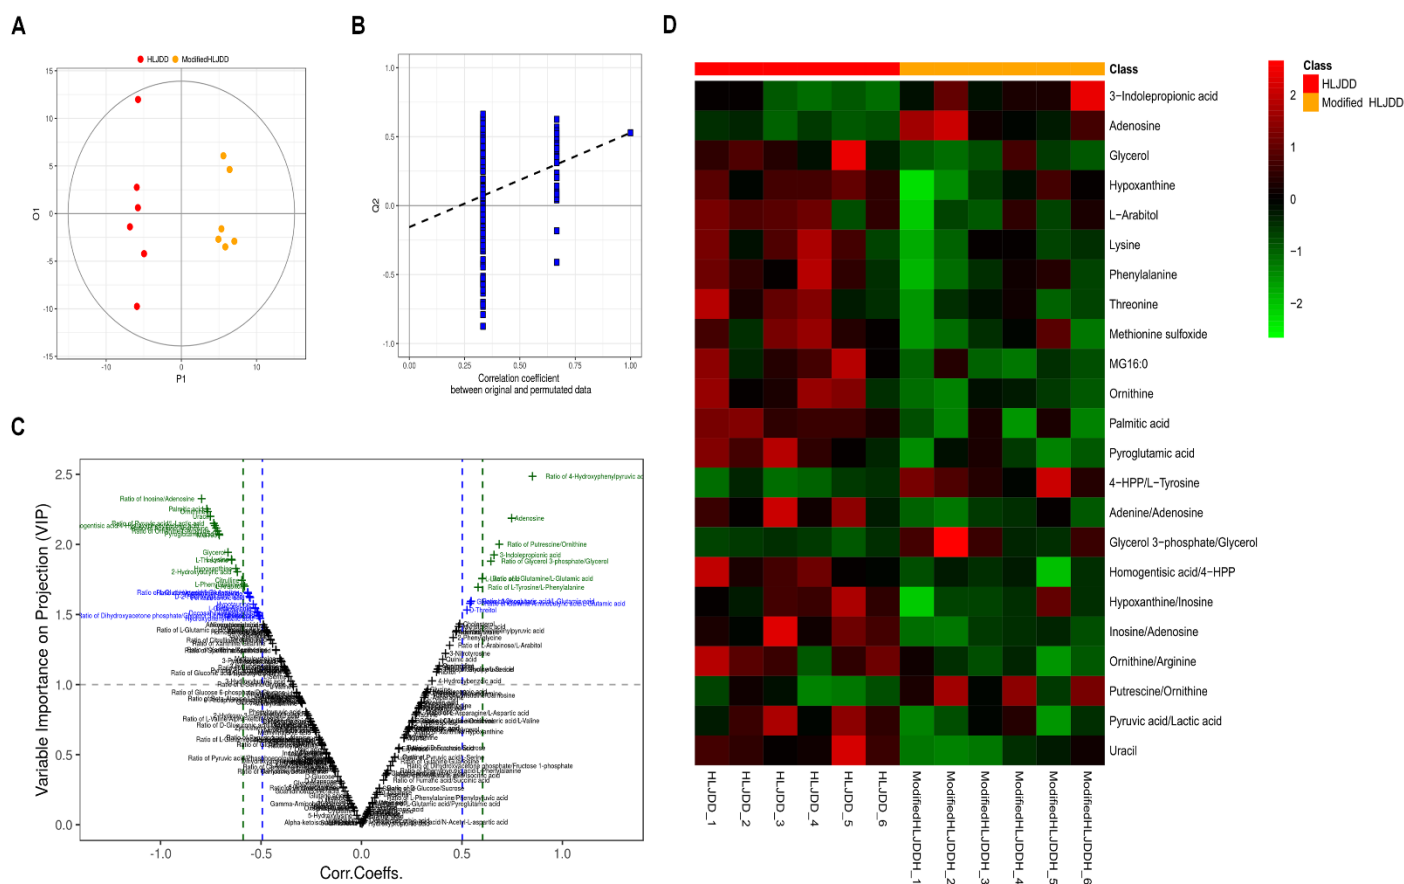

**Supplementary Fig. 5 The significant metabolites between HLJDD and modified-HLJDD treatment in the hippocampus in an AD model**

The scores plot between HLJDD and modified-HLJDD treatments with an OPLS-DA model and the permutation testing is shown in A and B. (C and D) Volcano plots and heatmaps are used to show the differential metabolites between these two groups. n = 6 per group.

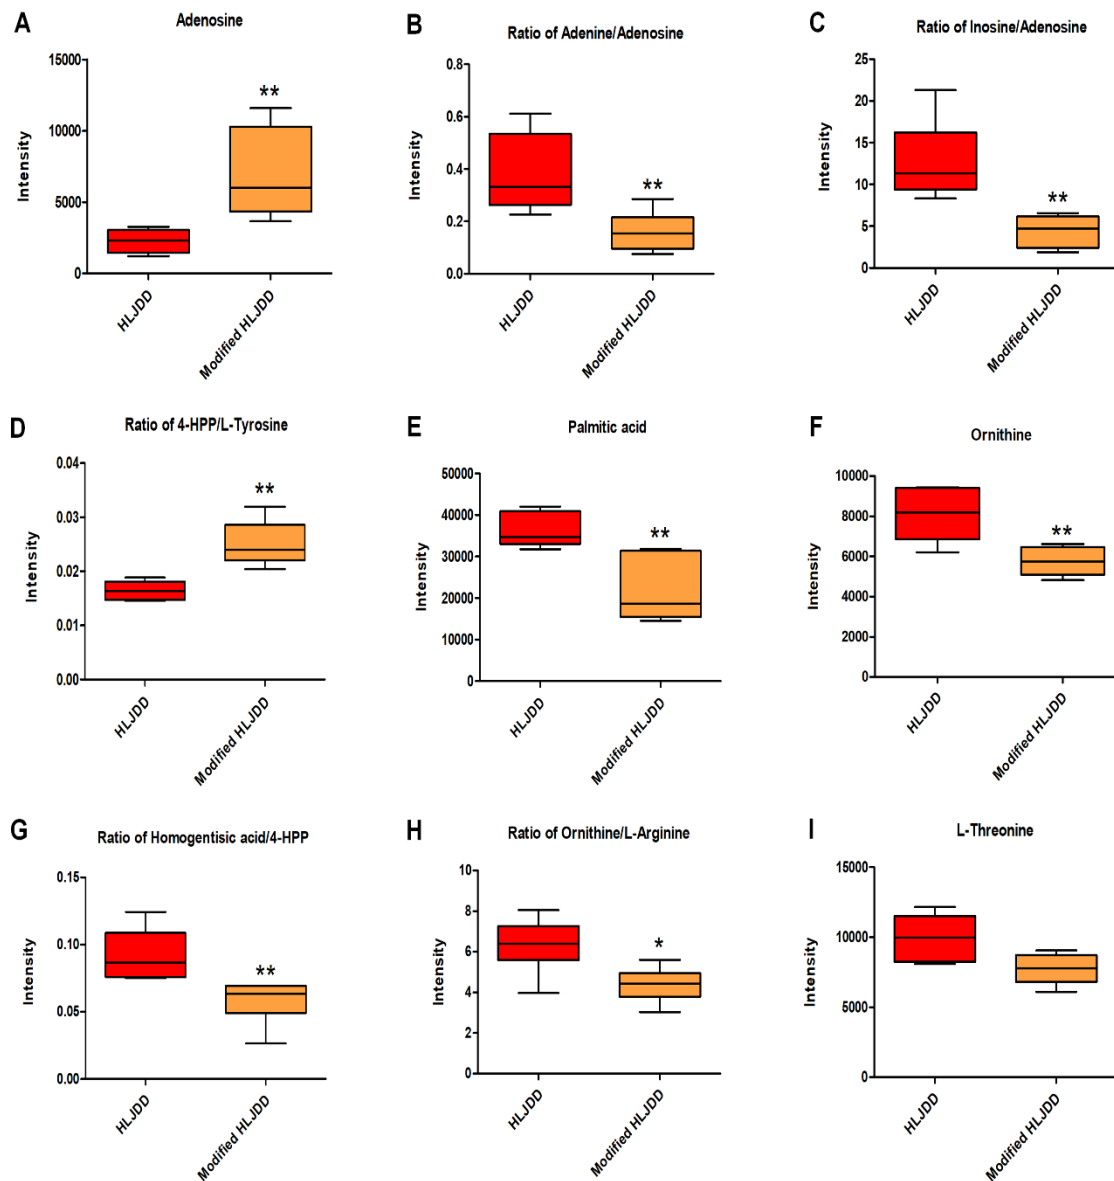

**Supplementary Fig. 6 Differential metabolites between HLJDD and modified-HLJDD treatments in the hippocampus in an AD model**

(A–I) Top-ranked differential metabolites between the two groups are shown.  $n = 6$  for HLJDD and modified-HLJDD groups. Results are expressed as the mean  $\pm$  SEM.  $**p < 0.01$ ,  $*p < 0.05$ . Statistical significance was determined by Student's  $t$  test.

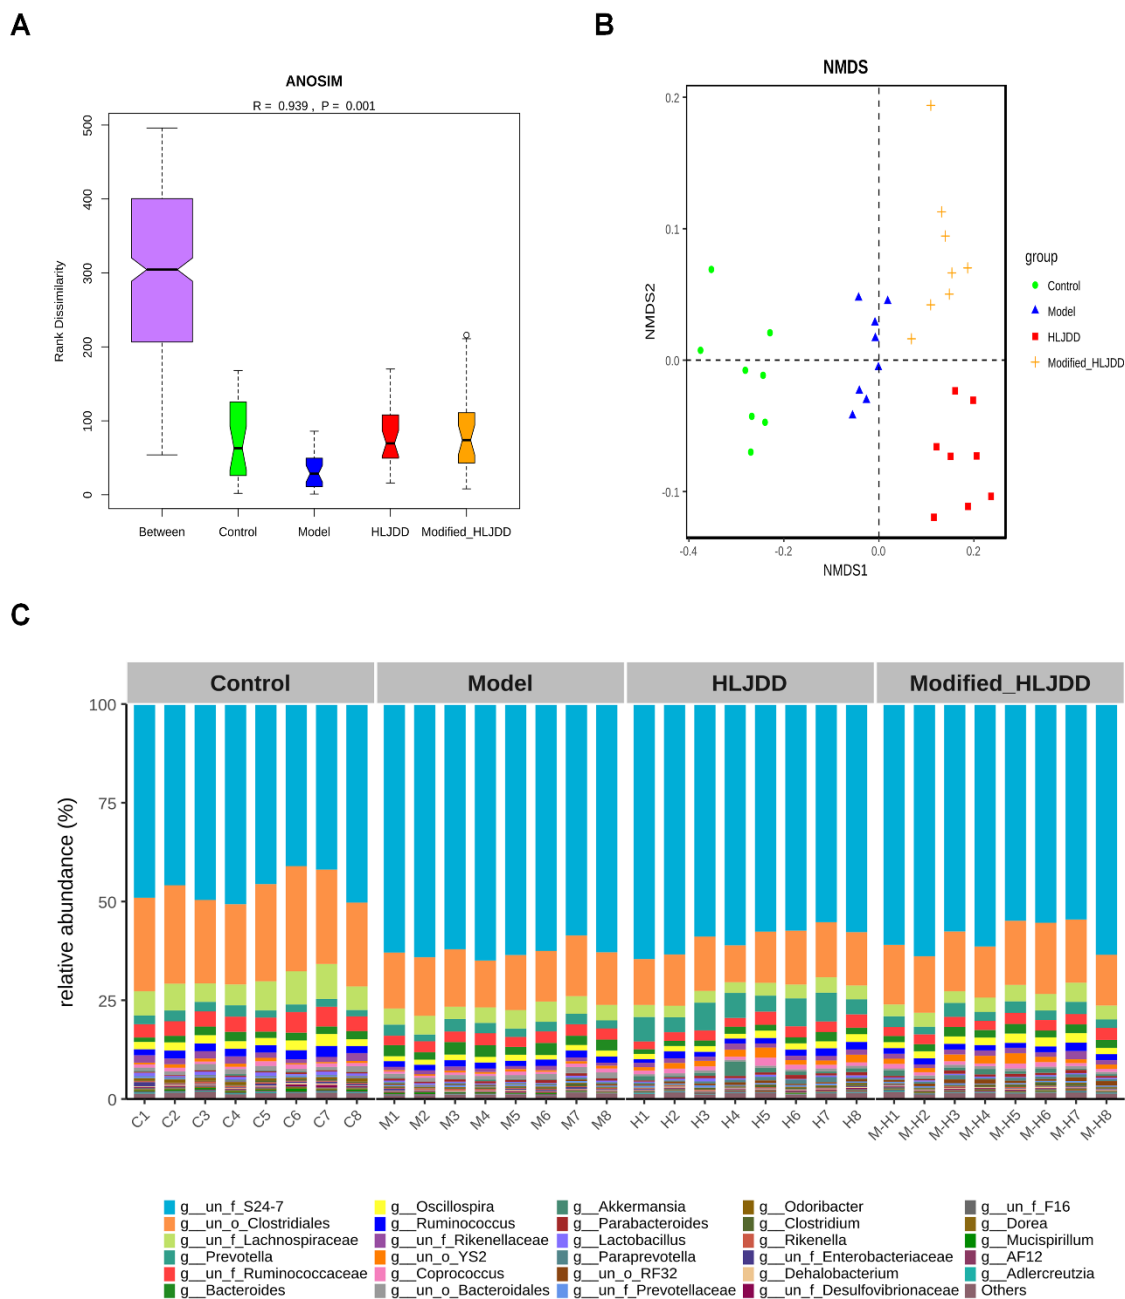

**Supplementary Fig. 7 The analysis of sample composition among these four groups**

(A–C) ANOSIM, NMDS analysis, and sample species composition analysis among these four groups are shown.

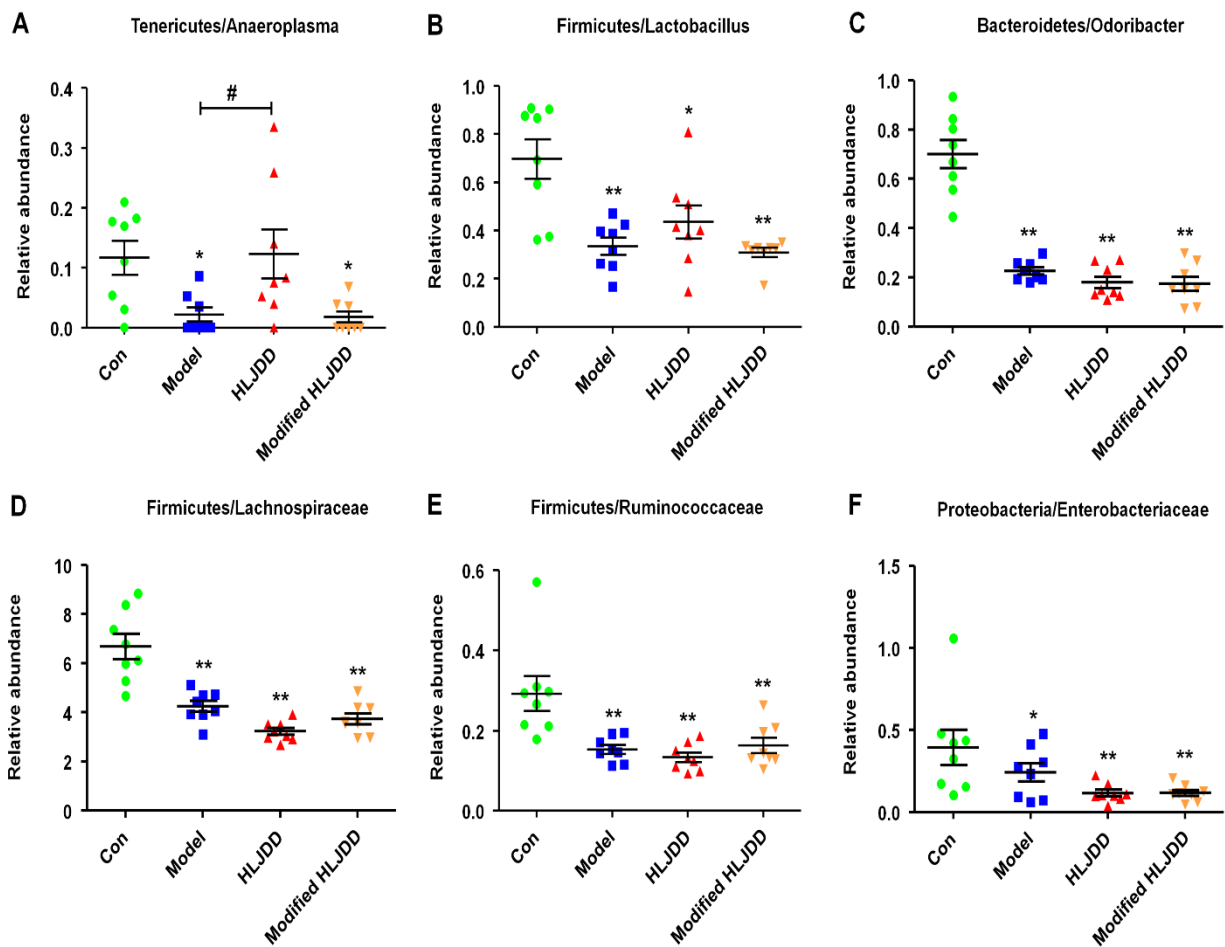

**Supplementary Fig. 8 Differential microbiota upon HLJDD and modified-HLJDD treatments in the AD model**

(A–I) Differential microbiota among these four groups is shown.  $n = 8$  per group. Results are expressed as the mean  $\pm$  SEM. \*\* $p < 0.01$ , \* $p < 0.05$  vs. control group; # $p < 0.05$  vs. model group. Statistical significance was determined by one-way ANOVA and Bonferroni tests as *post-hoc* comparisons.

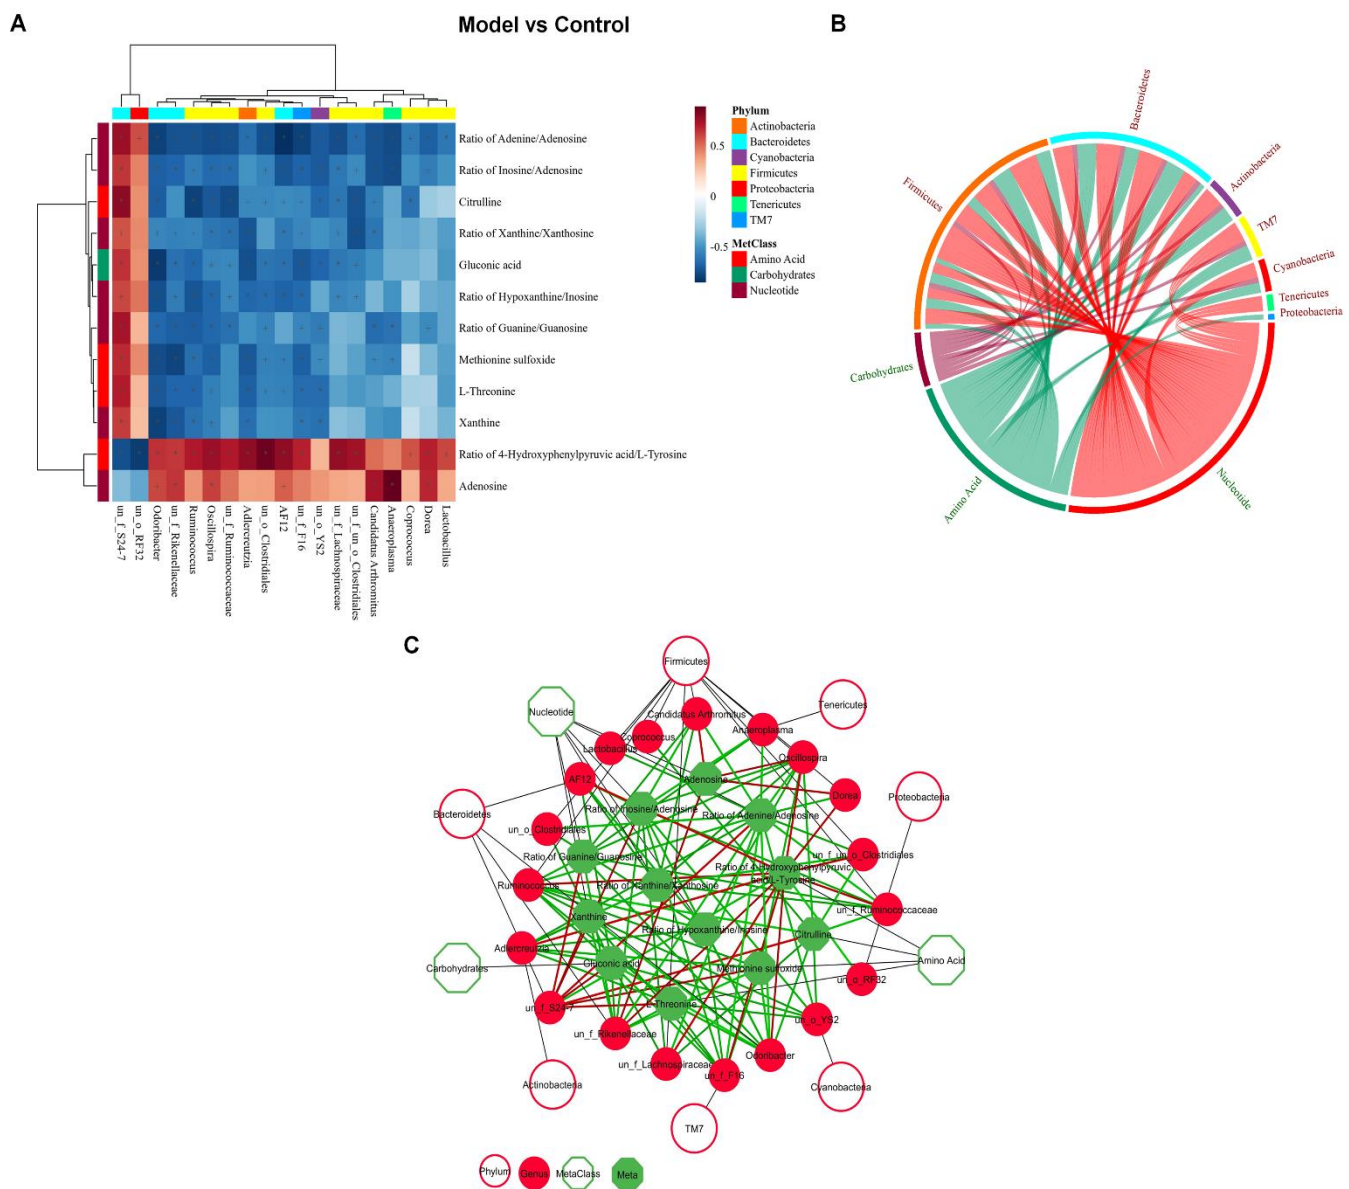

**Supplementary Fig. 9 The correlation between significant hippocampal metabolites and gut microbiota**

(A–C) The correlation between significant hippocampal metabolites and gut microbiota is shown for AD model vs. control in the form of a heatmap, chord diagram, and network diagram.

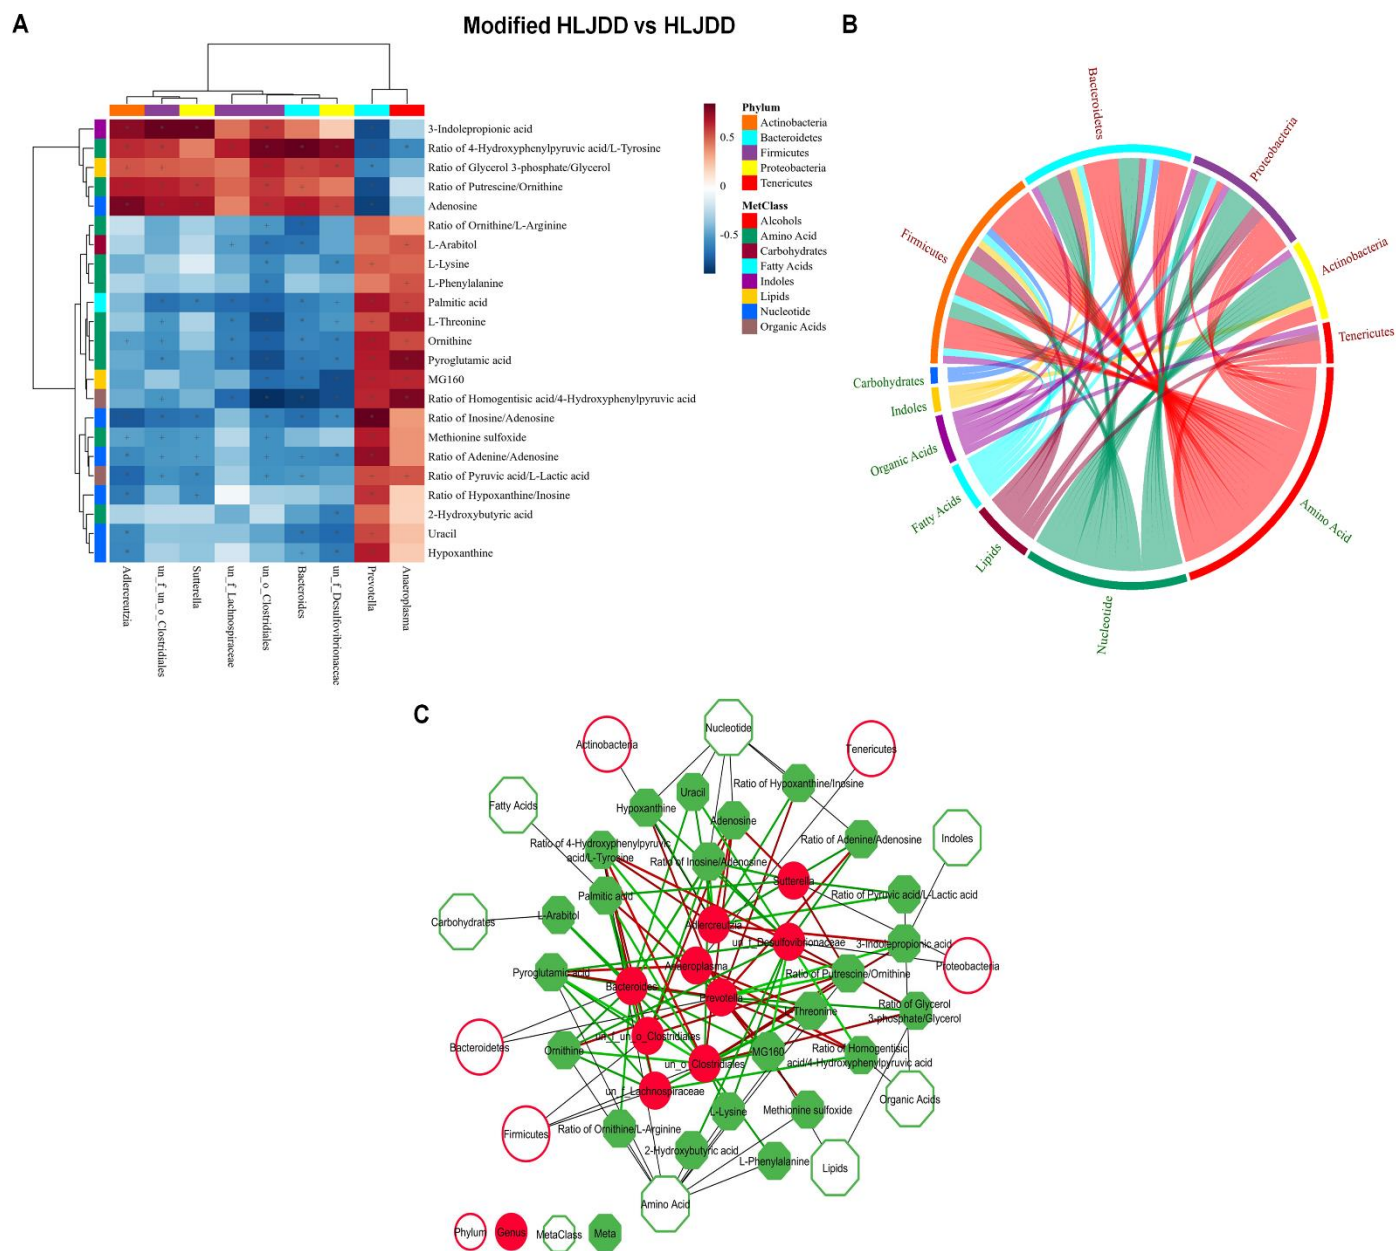

**Supplementary Fig. 10 The correlation between significant hippocampal metabolites and gut microbiota**

(A–C) The correlation between significant hippocampal metabolites and gut microbiota is shown for modified-HLJDD vs. HLJDD in the form of a heatmap, chord diagram, and network diagram.
